# Supplementary material for: A promising 1D Cd-based hybrid perovskite-type for white-light emission with high-color-rendering index
Source: Royal Society of Chemistry journal article supplement (doi:10.1039/d2ra04676h), 2022-01-01
Supplement: d2ra04676h1.pdf [file d2ra04676h1.pdf]

**ESI Figure Captions:**

**Figure S 1:** (a) Packing structure of 4-BAPC including the hydrogen bonds viewed along the b direction, (b) Hydrogen bonds type one, and (c) Hydrogen bonds type two.

**Figure S 2:**  $\pi$ ...Br interactions within the hybrid structure with the C...Br short contacts mapped on the Hirshfeld surfaces.

**Figure S 3:** (a): Hirshfeld surfaces of the different organic molecules mapped with shap index (black circles indicate C...H short contacts) and (b): C-H... $\pi$  interactions between the organic moieties.

**Figure S 4:** Infrared spectrum of 4-BAPC in the range of 450-4000  $\text{cm}^{-1}$ .

**Figure S 5:** Simultaneous thermogravimetric analysis and differential thermal analysis scan for  $(\text{C}_6\text{H}_7\text{NBr})_3[\text{CdBr}_5]$ .

**Figure S 6:** Zoomed band structure.

**Figure S 7:** Visualization of C...Br (a) and C...H (b) contacts, within the pur organic compound  $\text{C}_6\text{H}_6\text{BrN}$ , on the Hirshfeld surface and (c): different C-H... $\pi$  and N-H... $\pi$  interactions within the organic crystal  $\text{C}_6\text{H}_6\text{BrN}$ .

**Figure S 8:** Multi-peaks fitting of the PL spectra of  $(\text{C}_6\text{H}_7\text{BrN})^+\cdot\text{Br}^-$  salt ( $\lambda_{\text{exc}}=200$  nm)
