# Supplementary figures and images for: A promising 1D Cd-based hybrid perovskite-type for white-light emission with high-color-rendering index
Source: Royal Society of Chemistry journal article supplement (doi:10.1039/d2ra04676h), 2022-01-01

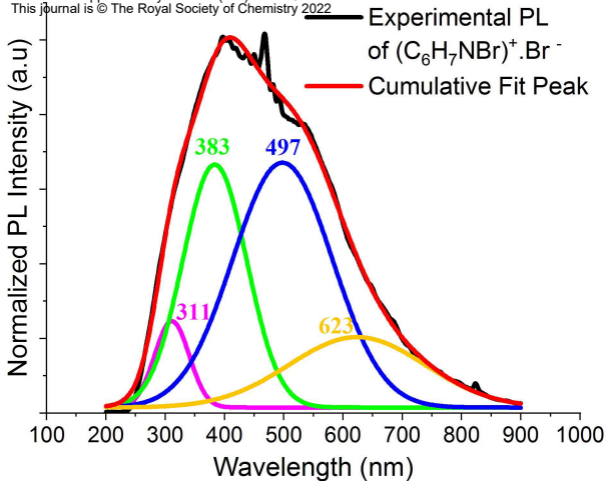

Supplement: d2ra04676h10.pdf [file d2ra04676h10.pdf]

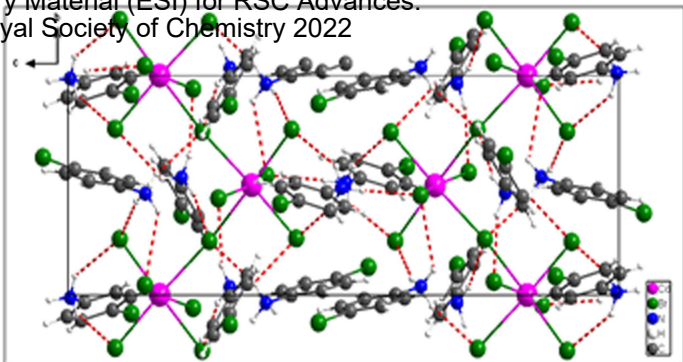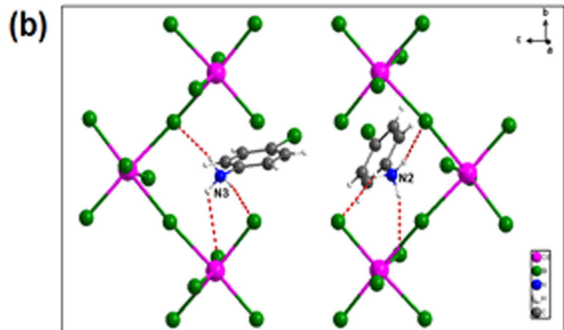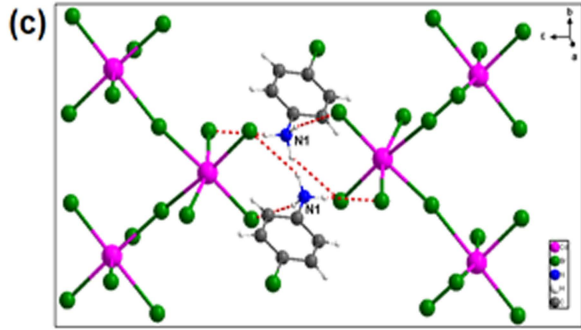

Supplement: d2ra04676h3.pdf [file d2ra04676h3.pdf]

(a)

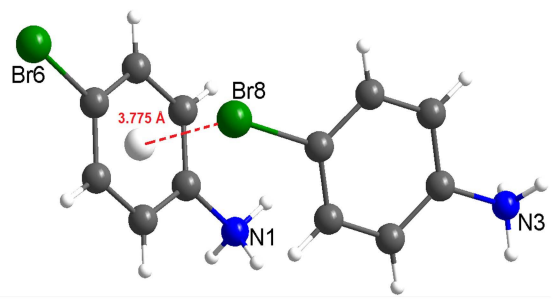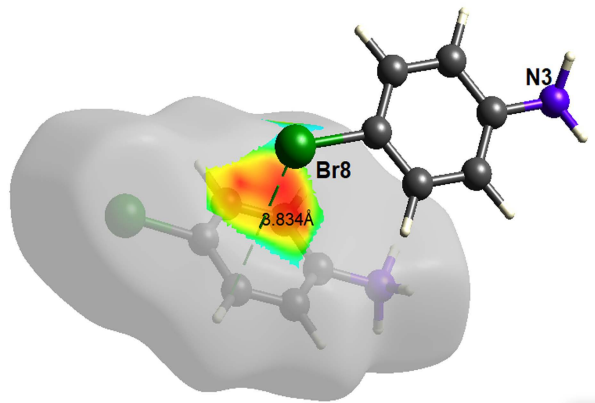

(b)

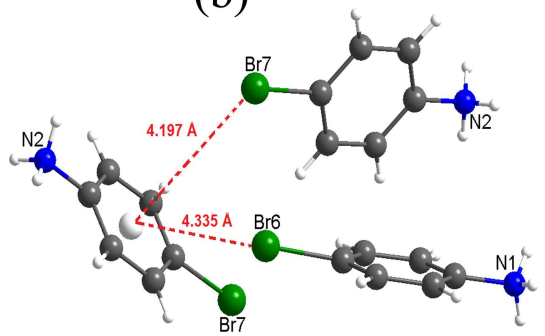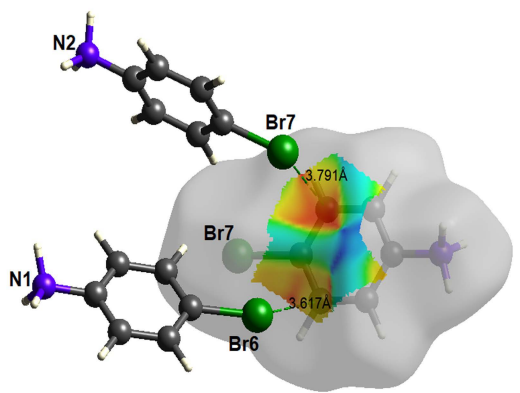

Supplement: d2ra04676h4.pdf [file d2ra04676h4.pdf]

(a)

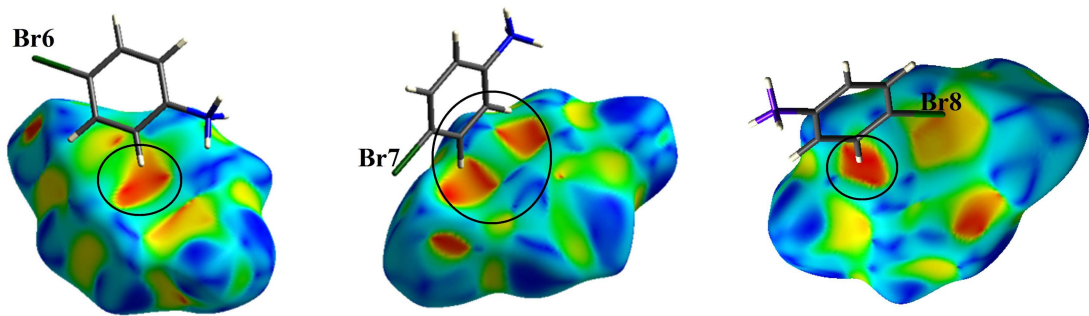

(b)

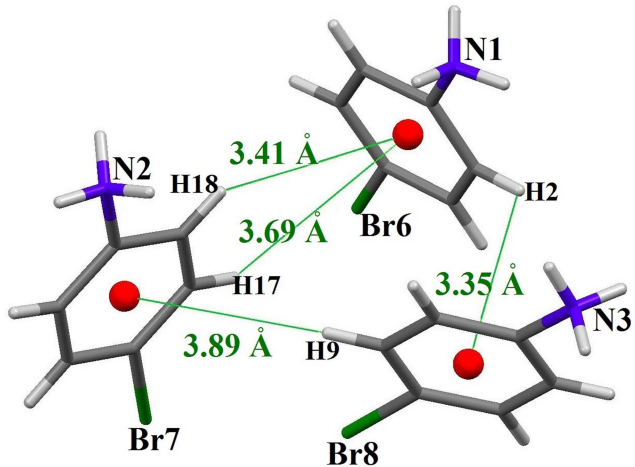

Supplement: d2ra04676h5.pdf [file d2ra04676h5.pdf]

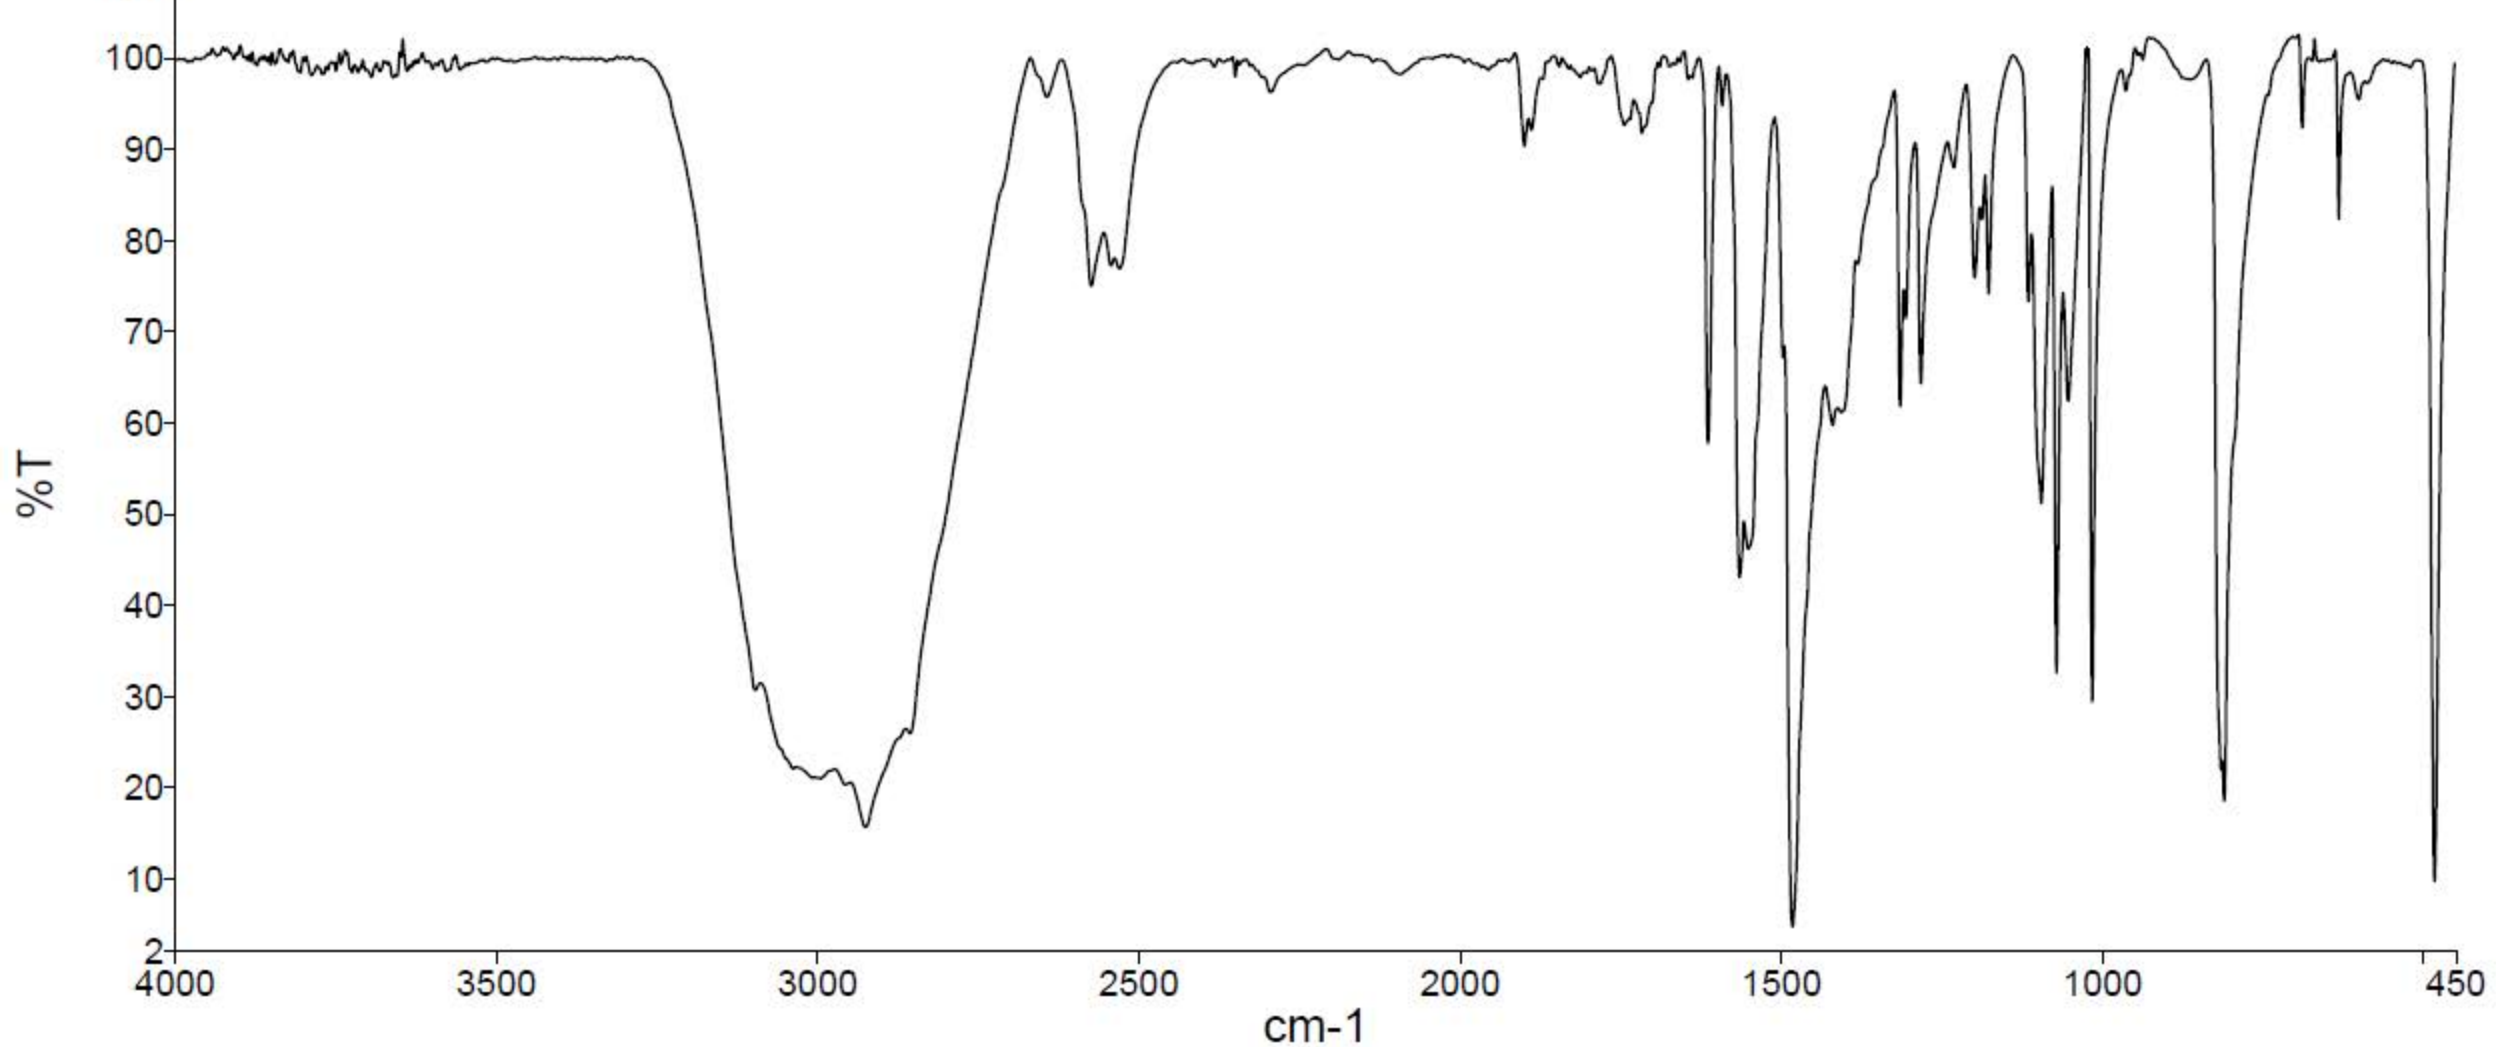

Supplement: d2ra04676h6.pdf [file d2ra04676h6.pdf]

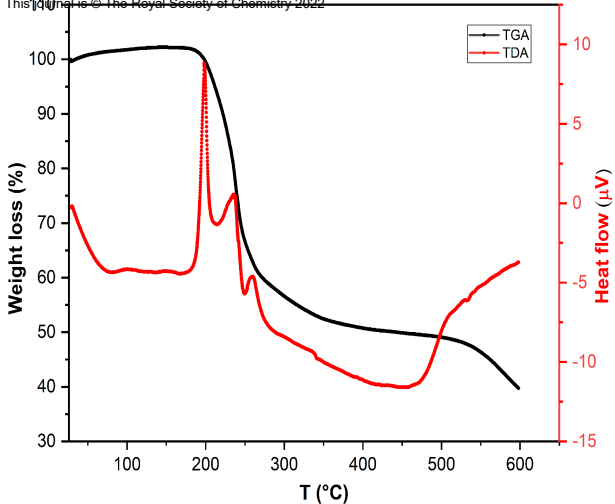

Supplement: d2ra04676h7.pdf [file d2ra04676h7.pdf]

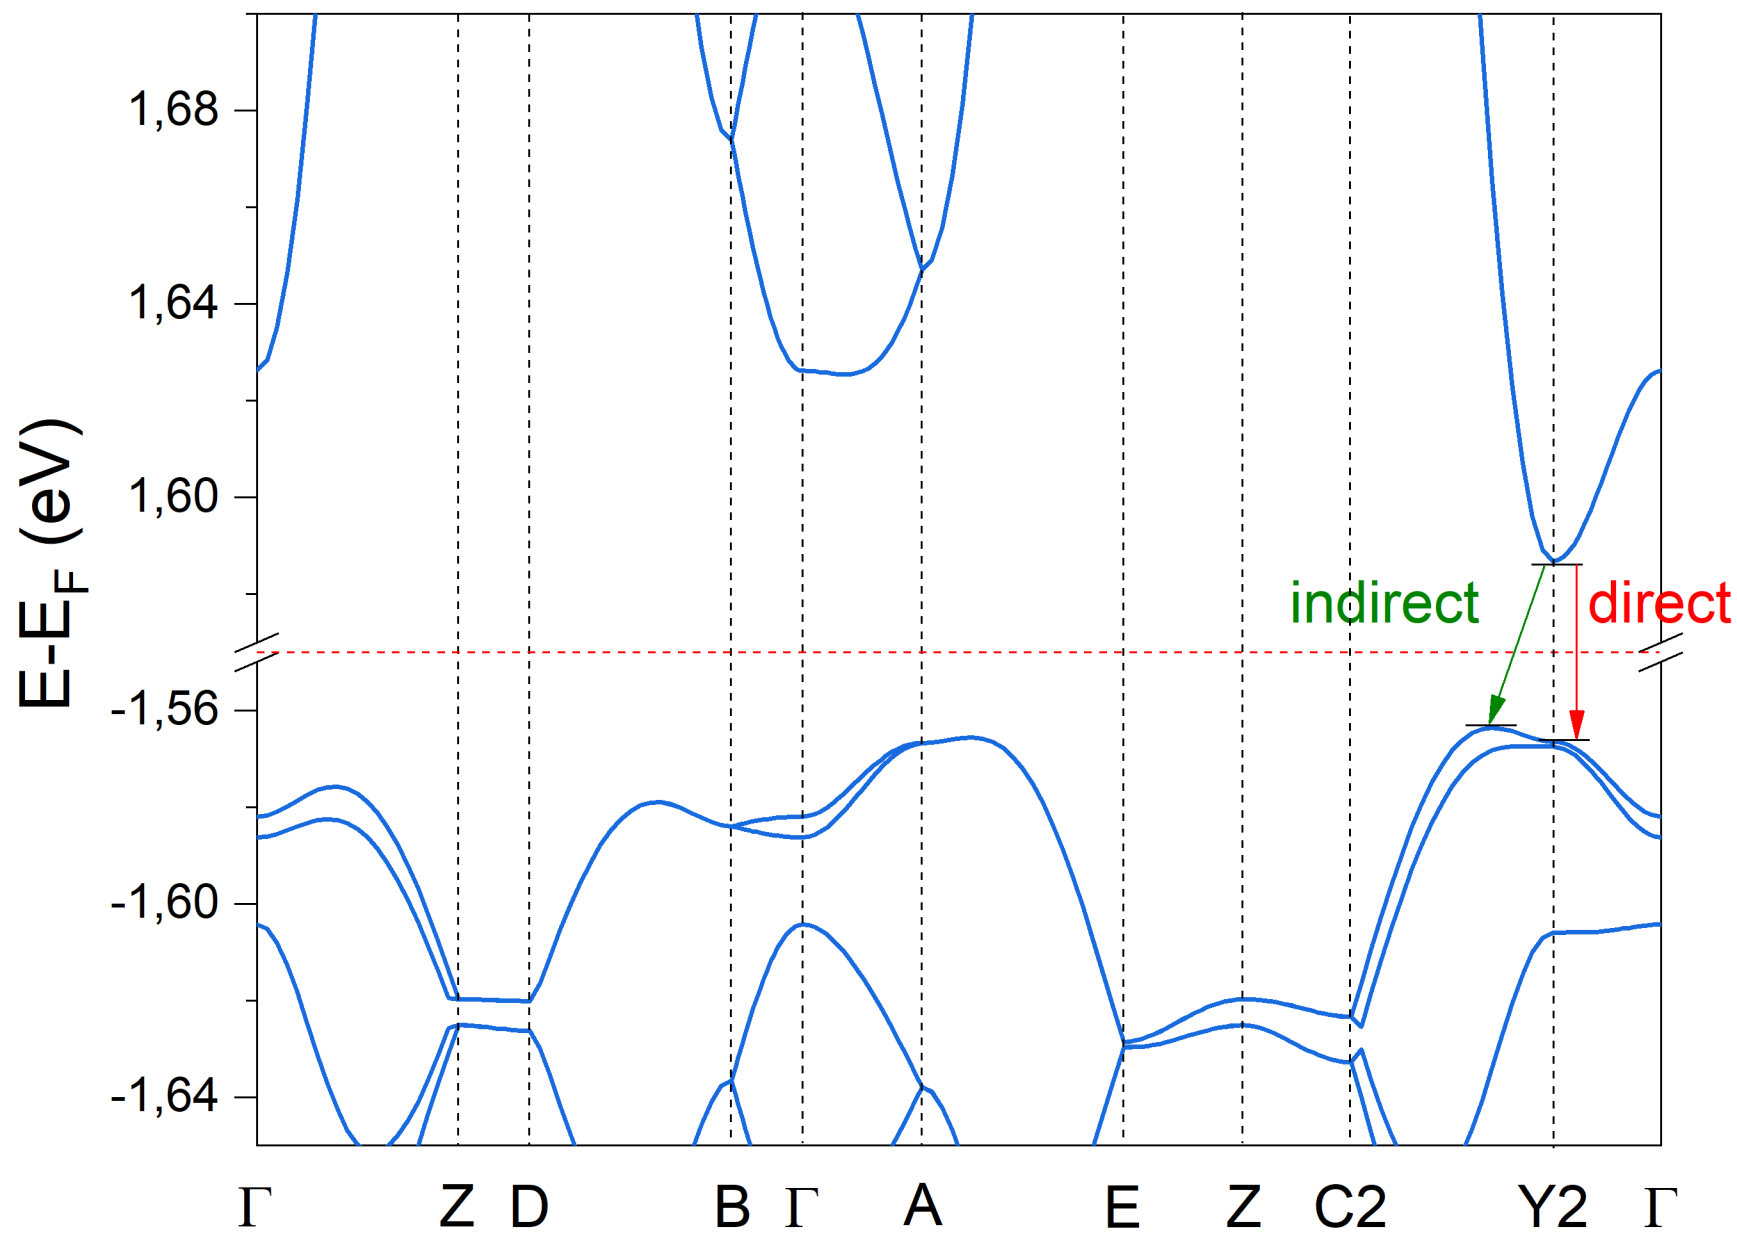

Supplement: d2ra04676h8.pdf [file d2ra04676h8.pdf]

(a)

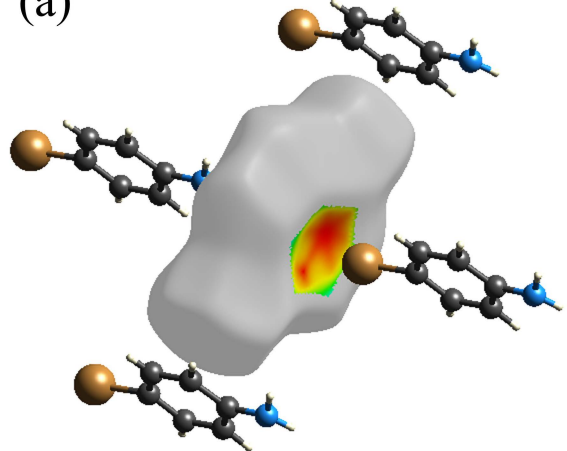

(b)

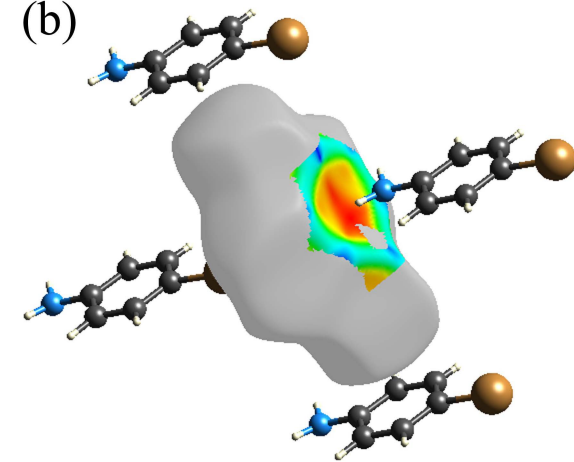

(c)

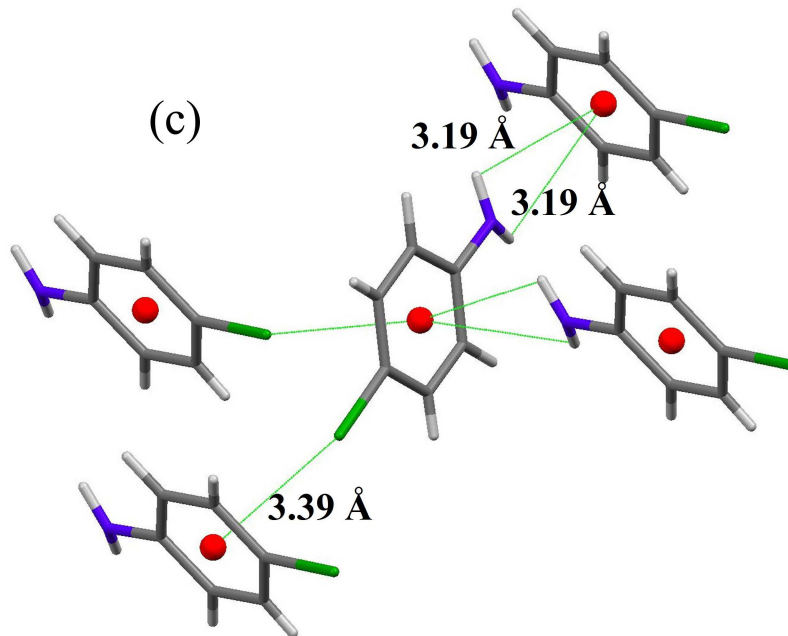

Supplement: d2ra04676h9.pdf [file d2ra04676h9.pdf]
